# Supplementary material for: Healthcare-associated foodborne outbreaks in high-income countries: a literature review and surveillance study, 16 OEDC countries, 2001 to 2019
Source: PubMed Central journal article supplement (PMC8518306; doi:10.2807/1560-7917.es.2021.26.41.2001278), 2021-10-14
Supplement: 20-01278_BOONE_Supplement.pdf [file 20-01278_BOONE_Supplement.pdf]

## Supplement S1

### Disclaimer

This supplementary material is hosted by Eurosurveillance as supporting information alongside the article [Healthcare-associated foodborne outbreaks in high-income countries: a literature review and surveillance study, 16 OEDC countries, 2001 to 2019], on behalf of the authors, who remain responsible for the accuracy and appropriateness of the content. The same standards for ethics, copyright, attributions and permissions as for the article apply. Supplements are not edited by Eurosurveillance and the journal is not responsible for the maintenance of any links or email addresses provided therein.

### Search strategy in PubMed for the literature review of healthcare-associated foodborne outbreaks

```
(((((nosocomial[Title/Abstract] OR "healthcare-associated"[Title/Abstract] OR "healthcare associated"[Title/Abstract] OR "health care associated"[Title/Abstract] OR "health care acquired"[Title/Abstract] OR "healthcare acquired infection"[Title/Abstract] OR HAI[Title/Abstract] OR HCAI[Title/Abstract] OR "hospital"[Title/Abstract] OR clinic[Title/Abstract] OR "health care facility"[Title/Abstract] OR "healthcare facility"[Title/Abstract] OR "health care facilities"[Title/Abstract] OR "health care facilities"[Title/Abstract] OR hospitals[Title/Abstract] OR "rehabilitation center"[Title/Abstract] OR "rehabilitation centers"[Title/Abstract] OR "rehabilitation centre"[Title/Abstract] OR "rehabilitation centres"[Title/Abstract] OR "medical center"[Title/Abstract] OR "medical centers"[Title/Abstract] OR "medical centre"[Title/Abstract] OR "medical centres" [Title/Abstract] OR "medical institution"[Title/Abstract] OR "medical institutions"[Title/Abstract] OR "nursing home"[Title/Abstract] OR "nursing homes"[Title/Abstract] OR "nursery home"[Title/Abstract] OR "nursery homes"[Title/Abstract]))) AND (outbreak*[Title/Abstract])) AND (food[Title/Abstract] OR foodborne[Title/Abstract] OR food-borne[Title/Abstract] OR Salmonella[Title/Abstract] OR Campylobacter[Title/Abstract] OR "Bacillus cereus"[Title/Abstract] OR Escherichia[Title/Abstract] OR Listeria[Title/Abstract] OR Norovirus[Title/Abstract])) AND ("2001"[Date - Publication] : "3000"[Date - Publication])
```

**Supplementary Table S1.** Overview of published articles on hospital associated foodborne outbreaks (2001-2018, n=57) in OECD countries and HA-FBOs from the German surveillance system (SurvNet, 2012-2018, n=28)

| Agent causing outbreak                      | Country     | Likely source or vehicle             | Year of outbreak | Healthcare Setting                     | Evidence: link cases and food vehicle                                                                         | No of cases | No of deaths | Personnel in cases | Age groups                | Median (range) years     | No of female cases/N | % females | Ref <sup>a</sup> |
|---------------------------------------------|-------------|--------------------------------------|------------------|----------------------------------------|---------------------------------------------------------------------------------------------------------------|-------------|--------------|--------------------|---------------------------|--------------------------|----------------------|-----------|------------------|
| <b><i>Salmonella</i> spp.</b>               |             |                                      |                  |                                        |                                                                                                               |             |              |                    |                           |                          |                      |           |                  |
| <i>S. Brandenburg</i> + <i>S. Corvallis</i> | Japan       | Unknown                              | 2001             | Hospital                               | Epi descriptive; Mibi <sup>b</sup> : detection in food vehicle or its component                               | 8           | 0            | no                 | Elderly                   | (66-88)                  | NA <sup>c</sup>      | NA        | [1]              |
| <i>S. Enteritidis</i>                       | Netherlands | Bavarian cream-dessert               | 2001             | Hospital and nursing home              | Epi analytical: cohort study                                                                                  | 82          | 5            | yes                | Elderly                   | NA                       | NA                   | NA        | [2]              |
| <i>S. Typhimurium</i>                       | Australia   | Rice pudding, meat based, potato pie | 2001             | Aged care facility                     | Epi descriptive; detection in food vehicle or its component; product-tracing                                  | 18          | 0            | yes                | Adults, Elderly           | NA                       | NA                   | NA        | [3]              |
| <i>S. Enteritidis</i>                       | UK          | Imported eggs                        | 2002             | Hospital                               | Epi descriptive; Mibi: detection in food vehicle or its component                                             | 29          | 1            | no                 | NA                        | NA                       | NA                   | NA        | [4]              |
| <i>S. Infantis</i>                          | Germany     | Pasta, vegetables, rice              | 2002-2009        | Rehabilitation oncology clinic         | Epi descriptive; Mibi: detection in food vehicle or its component; detection in food chain or its environment | 90          | 0            | yes                | NA                        | NA                       | NA                   | NA        | [5]              |
| <i>S. Javiana</i>                           | USA         | Salad, fresh vegetable               | 2003             | Tertiary hospital. Children's Hospital | Epi analytical: case-control study                                                                            | 101         | 0            | yes                | Adults, Children          | NA                       | NA                   | NA        | [6]              |
| <i>S. Enteritidis</i>                       | Germany     | Contaminated pudding/curd dumpling   | 2004             | Hospitals, Elderly homes               | Epi analytical: case-control study; Product-tracing                                                           | 47          | 0            | yes                | Adults, Elderly           | 83 (57-102) <sup>d</sup> | 27/37 <sup>d</sup>   | 73        | [7]              |
| <i>S. Enteritidis</i>                       | Greece      | Unknown                              | 2005             | Hospital                               | Epi analytical: case-control study                                                                            | 102         | 2            | yes                | Adults, Elderly, Children | 60 <sup>e</sup>          | NA                   | 67        | [8]              |
| <i>S. Enteritidis</i>                       | Germany     | Bakery products (cake)               | 2006             | Nursing home                           | Epi analytical: cohort study; Mibi: detection in                                                              | 111         | 1            | yes                | Adults, Elderly           | NA                       | NA                   | NA        | [9]              |

| Agent causing outbreak     | Country                             | Likely source or vehicle           | Year of outbreak | Healthcare Setting                                            | Evidence: link cases and food vehicle                                                                         | No of cases                     | No of deaths | Personnel in cases | Age groups                           | Median (range) years          | No of female cases/N | % females       | Ref <sup>a</sup> |
|----------------------------|-------------------------------------|------------------------------------|------------------|---------------------------------------------------------------|---------------------------------------------------------------------------------------------------------------|---------------------------------|--------------|--------------------|--------------------------------------|-------------------------------|----------------------|-----------------|------------------|
|                            |                                     |                                    |                  |                                                               | food vehicle or its component                                                                                 |                                 |              |                    |                                      |                               |                      |                 |                  |
| <i>S. Oranienburg</i>      | USA + Canada                        | Fruit salad                        | 2006             | Health care facilities                                        | Epi analytical: case-control study                                                                            | 29                              | 0            | yes                | Adults, Elderly, Infant <sup>f</sup> | 59 (8 months-96) <sup>g</sup> | 28/41                | 68 <sup>g</sup> | [10]             |
| <i>S. Enteritidis</i>      | Germany                             | Unknown                            | 2007             | Hospital                                                      | Epi analytical: case-control study                                                                            | 33                              | 0            | yes                | Adults, Elderly, Children            | 66 (1-87)                     | 17                   | 61              | [11]             |
| <i>S. Enteritidis</i>      | Germany                             | Cheesecake                         | 2010             | Tertiary care hospital/children's hospital (3 hospitals)      | Epi descriptive                                                                                               | 4                               | 0            | no                 | Adults, Children                     | NA                            | NA                   | NA              | [12]             |
| <i>S. Newport</i>          | Germany + Netherlands               | Mung bean sprouts                  | 2011             | Rehabilitation clinic in Germany, Hospital in the Netherlands | Epi analytical: case-control study; Mibi: detection in food vehicle or its component; Product-tracing         | ≥ 2 (2 in NL; NA for HCF in DE) | 0            | NA                 | NA                                   | NA                            | NA                   | NA              | [13]             |
| <i>S. Enteritidis</i>      | USA                                 | Raw unpasteurized shell egg        | 2012             | Long-term care facility                                       | Epi analytical: cohort study                                                                                  | 21                              | 0            | yes                | Adults, Elderly                      | 83 (21-94)                    | 15                   | 71              | [14]             |
| <i>S. Bovismorbificans</i> | Germany                             | Unknown                            | 2013             | Rehabilitation centre                                         | No details/unknown/weak                                                                                       | 37                              | 0            | NA                 | Adults, Children Infants             | 12 (0-44)                     | 20                   | 46              | SN1              |
| <i>S. Derby</i>            | Germany                             | Spreadable raw sausages (Teewurst) | 2013-2014        | Hospitals and residential institutions                        | Epi descriptive; Mibi: detection in food vehicle or its component; detection in food chain or its environment | 130 <sup>h</sup>                | 1            | yes <sup>i</sup>   | Adults, Elderly, Children Infants    | 76 (0-100) <sup>j</sup>       | 76 <sup>j</sup> /150 | 51 <sup>j</sup> | SN2*             |
| <i>S. Enteritidis</i>      | Germany                             | Unknown                            | 2013             | Nursing home                                                  | No details/unknown/weak                                                                                       | 11                              | 0            | NA                 | Adults, Elderly, Children            | 79 (16-96)                    | 11                   | 100             | SN3              |
| <i>S. Enteritidis</i>      | UK (part of multinational outbreak) | Eggs from a German producer        | 2014             | Hospital                                                      | Epi descriptive; detection in food vehicle or its component; product-tracing                                  | 32                              | 1            | yes                | NA                                   | NA                            | NA                   | NA              | [15]             |

| Agent causing outbreak | Country | Likely source or vehicle                         | Year of outbreak | Healthcare Setting                               | Evidence: link cases and food vehicle                                                                        | No of cases | No of deaths | Personnel in cases | Age groups                | Median (range) years    | No of female cases/N | % females        | Ref <sup>a</sup> |
|------------------------|---------|--------------------------------------------------|------------------|--------------------------------------------------|--------------------------------------------------------------------------------------------------------------|-------------|--------------|--------------------|---------------------------|-------------------------|----------------------|------------------|------------------|
| <i>S. Enteritidis</i>  | Germany | Unknown                                          | 2014             | Nursing home                                     | No details/unknown/weak                                                                                      | 4           | 0            | no                 | Elderly                   | 88 (85-94)              | 4                    | 100              | SN4              |
| <i>S. Gruppe B</i>     | Germany | Unknown                                          | 2014             | Hospital                                         | No details/unknown/weak                                                                                      | 3           | 0            | NA                 | Adults                    | 31 (24-37)              | 0                    | 0                | SN5              |
| <i>S. Muenchen</i>     | Germany | Raw pork products                                | 2014             | 3 Nursing homes                                  | Epi analytical; Mibi: detection in food vehicle or its component; detection in food chain or its environment | NA          | NA           | yes<br>≥ 6         | NA                        | NA                      | NA                   | NA               | [16]             |
| <i>S. Gruppe B</i>     | Germany | Unknown                                          | 2015             | Nursing home                                     | No details/unknown/weak                                                                                      | 9           | 0            | NA                 | Adults, Elderly, Children | 84 (16-98)              | 8                    | 67               | SN6              |
| <i>S. Enteritidis</i>  | Germany | Sauce for cabbage roulade                        | 2017             | Nursing home                                     | Epi descriptive; Mibi: detection in food vehicle or its component                                            | 10          | 0            | no                 | Elderly                   | 83 (75-93)              | 10                   | 67               | SN7*             |
| <i>S. Enteritidis</i>  | Germany | Unknown                                          | 2018             | Nursing home                                     | No details/unknown/weak                                                                                      | 3           | 0            | NA                 | Adults, Elderly           | 56 (55-68)              | NA                   | NA               | SN8              |
| <b>Norovirus</b>       |         |                                                  |                  |                                                  |                                                                                                              |             |              |                    |                           |                         |                      |                  |                  |
| Norovirus              | Spain   | Whipped cream mousse                             | 2001             | Elderly home                                     | Epi analytical: case-control study                                                                           | 56          | 0            | yes                | Adults, Elderly           | mean 83 (56-101)        | 32                   | 78               | [17]             |
| Norovirus <sup>k</sup> | Spain   | Dried fruit, strawberry jam                      | 2002             | Health Centre                                    | Epi analytical: cohort study                                                                                 | 50          | 0            | yes                | Adults                    | NA                      | NA                   | NA               | [18]             |
| Norovirus              | Denmark | Frozen raspberry pieces                          | 2005             | Hospital, Nursing homes                          | Epi analytical: case-control study; cohort study                                                             | 570         | 0            | NA                 | Adults, Elderly           | NA                      | NA                   | NA               | [19]             |
| Norovirus              | Italy   | Thin soup                                        | 2006             | Elderly home                                     | Epi analytical: cohort study                                                                                 | 29          | 0            | yes                | Adults, Elderly           | 74 (19-97) <sup>l</sup> | NA                   | NA               | [20]             |
| Norovirus              | Japan   | Unknown                                          | 2007             | Hospital, Long-Term Care facility, Daycare users | Epi analytical: cohort study                                                                                 | 102         | 0            | yes                | Adults, Elderly           | 56 (IQR 45-66)          | 18                   | 33               | [21]             |
| Norovirus              | Austria | Cold sliced sausage, meat dish with salad, hand- | 2009             | Healthcare facility (Hospital+rehabilitation)    | Epi analytical: cohort study, others                                                                         | 148         | 0            | yes                | Adults, Elderly?          | 52 <sup>m</sup>         | NA                   | Sex ratio (male) | [22]             |

| Agent causing outbreak | Country | Likely source or vehicle                                    | Year of outbreak | Healthcare Setting                                               | Evidence: link cases and food vehicle                                                                         | No of cases | No of deaths | Personnel in cases | Age groups               | Median (range) years | No of female cases/N | % females                   | Ref <sup>a</sup> |
|------------------------|---------|-------------------------------------------------------------|------------------|------------------------------------------------------------------|---------------------------------------------------------------------------------------------------------------|-------------|--------------|--------------------|--------------------------|----------------------|----------------------|-----------------------------|------------------|
|                        |         | rolled spinach pancake                                      |                  | centre, convalescent home)                                       |                                                                                                               |             |              |                    |                          |                      |                      | :female): 0.77 <sup>m</sup> |                  |
| Norovirus              | Germany | Unknown                                                     | 2011             | University hospital                                              | Epi descriptive                                                                                               | 144         | 0            | yes                | NA                       | NA                   | NA                   | NA                          | [23]             |
| Norovirus              | Germany | Frozen strawberry                                           | 2012             | Disability care (3), elderly homes (2) rehabilitation clinic (1) | Epi analytical: case-control study; Product-tracing                                                           | NA          | 0            | NA                 | NA                       | NA                   | NA                   | NA                          | [24]             |
| Norovirus              | France  | Oysters                                                     | 2012             | Nursing home                                                     | Epi analytical: cohort study; Mibi: detection in food vehicle or its component                                | 55          | 1            | yes                | Adults, Elderly          | NA                   | NA                   | NA                          | [25]             |
| Norovirus              | Germany | Unknown                                                     | 2013             | Hospital                                                         | No details/unknown/weak                                                                                       | 5           | 0            | NA                 | Adults                   | 35 (29-45)           | 3                    | 60                          | SN9              |
| Norovirus              | Germany | Unknown dishes prepared in the hospital kitchen             | 2013             | Hospital/medical care facility                                   | Epi descriptive                                                                                               | 14          | 0            | NA <sup>l</sup>    | Adults, Elderly          | 72 (23-80)           | 4                    | 29                          | SN10*            |
| Norovirus              | Germany | Unknown                                                     | 2016             | Rehabilitation centre                                            | No details/unknown/weak                                                                                       | 35          | 0            | NA                 | Adults, Children         | 7 (1-51)             | 25                   | 71                          | SN11             |
| Norovirus              | Germany | Raspberry fruit quark, with frozen raspberries <sup>n</sup> | 2016             | Hospital/medical care facility                                   | Epi descriptive; Mibi: detection in food vehicle or its component; Product-tracing                            | 103         | 0            | NA                 | Adults, Elderly          | 34 (19-68)           | 7                    | 7                           | SN12*            |
| Norovirus              | Germany | Frozen raspberries <sup>o</sup>                             | 2016             | Hospital/medical care facility                                   | Epi descriptive; Mibi: detection in food vehicle or its component; detection in food chain or its environment | 25          | 0            | NA                 | Elderly, Adults, Infants | 65 (0-79)            | 6/18 <sup>p</sup>    | 33                          | SN13*            |
| Norovirus              | Germany | Unknown                                                     | 2016             | Hospital                                                         | No details/unknown/weak                                                                                       | 6           | 0            | NA                 | Adults, Elderly          | 76 (40-82)           | 6                    | 100                         | SN14             |

| Agent causing outbreak               | Country | Likely source or vehicle     | Year of outbreak | Healthcare Setting       | Evidence: link cases and food vehicle                                                                         | No of cases | No of deaths | Personnel in cases | Age groups               | Median (range) years | No of female cases/N | % females | Ref <sup>a</sup> |
|--------------------------------------|---------|------------------------------|------------------|--------------------------|---------------------------------------------------------------------------------------------------------------|-------------|--------------|--------------------|--------------------------|----------------------|----------------------|-----------|------------------|
| Norovirus                            | Germany | Unknown                      | 2016             | Nursing home             | No details/unknown/weak                                                                                       | 54          | 0            | NA                 | Elderly, Adults, Infants | 64 (0-93)            | 4/6 <sup>q</sup>     | 67        | SN15             |
| Norovirus                            | Germany | Unknown                      | 2017             | Hospital                 | No details/unknown/weak                                                                                       | 35          | 0            | NA                 | Adults (80% missing)     | NA                   | 25                   | 71        | SN16             |
| Norovirus                            | Germany | Unknown                      | 2017             | Hospital                 | No details/unknown/weak                                                                                       | 21          | 0            | NA                 | Adults, Elderly          | 48 (18-84)           | 15                   | 71        | SN17             |
| Norovirus                            | Germany | Unknown                      | 2017             | Hospital                 | No details/unknown/weak                                                                                       | 13          | 0            | NA                 | Adults, Elderly          | 72 (50-81)           | 4                    | 31        | SN18             |
| Norovirus                            | Germany | Bread, bread rolls           | 2017             | Nursing home             | Epi descriptive                                                                                               | 126         | 0            | NA <sup>i</sup>    | Elderly, Adults, Infants | 69 (0-95)            | 94                   | 75        | SN19*            |
| Norovirus                            | Germany | Unknown                      | 2018             | Rehabilitation centre    | No details/unknown/weak                                                                                       | 7           | 0            | NA                 | Adults, Children         | 24 (1-59)            | 9                    | 75        | SN20             |
| Norovirus                            | Germany | Unknown                      | 2018             | Nursing home             | No details/unknown/weak                                                                                       | 2           | 0            | no                 | Elderly                  | (83-89)              | NA                   | NA        | SN21             |
| <b><i>Listeria monocytogenes</i></b> |         |                              |                  |                          |                                                                                                               |             |              |                    |                          |                      |                      |           |                  |
| <i>L. monocytogenes</i>              | UK      | Sandwiches                   | 2003             | Hospital - oncology unit | Epi descriptive; Mibi: detection in food vehicle or its component; detection in food chain or its environment | 2           | 2            | no                 | Adults                   | (46-63)              | 2                    | 100       | [26]             |
| <i>L. monocytogenes</i>              | UK      | Prepacked sandwiches         | 2003             | Hospital                 | Epi descriptive; Mibi: detection in food vehicle or its component                                             | 4           | 0            | no                 | Adults (pregnant)        | NA                   | 4                    | 100       | [27]             |
| <i>L. monocytogenes</i>              | UK      | Sandwiches: various fillings | 2004             | Hospital                 | Epi descriptive; Mibi: detection in food vehicle or its component; detection in food chain or its environment | 2           | 1            | no                 | Elderly                  | NA                   | 0                    | 0         | [28]             |

| Agent causing outbreak  | Country | Likely source or vehicle                    | Year of outbreak | Healthcare Setting                | Evidence: link cases and food vehicle                                                                                          | No of cases | No of deaths    | Personnel in cases | Age groups      | Median (range) years | No of female cases/N | % females | Ref <sup>a</sup> |
|-------------------------|---------|---------------------------------------------|------------------|-----------------------------------|--------------------------------------------------------------------------------------------------------------------------------|-------------|-----------------|--------------------|-----------------|----------------------|----------------------|-----------|------------------|
| <i>L. monocytogenes</i> | Germany | Ready to eat scalded sausage                | 2006-2007        | Hospital                          | Epi descriptive; Mibi: detection in food vehicle or its component; detection in food chain or its environment                  | 11          | 5               | no                 | Adults, Elderly | 72 (50-83)           | 4                    | 36        | [29]             |
| <i>L. monocytogenes</i> | Norway  | Camembert cheese made from pasteurised milk | 2007             | Tertiary care hospital            | Epi descriptive; Mibi: detection in food vehicle or its component                                                              | 17          | 3               | yes                | Adults, Elderly | 64 (27-84)           | 11                   | 65        | [30]             |
| <i>L. monocytogenes</i> | Canada  | Delicatessen meat                           | 2008             | Long-term care facility, hospital | Epi descriptive; Mibi: detection in food vehicle or its component; detection in food chain or its environment; Product-tracing | 48          | 24 <sup>r</sup> | no                 | Adults, Elderly | 78 (29-98)           | NA                   | NA        | [31]             |
| <i>L. monocytogenes</i> | UK      | Sandwiches: various fillings                | 2008             | Hospital                          | Epi descriptive; Mibi: detection in food vehicle or its component                                                              | 3           | 1               | no                 | Elderly         | NA                   | NA                   | NA        | [28]             |
| <i>L. monocytogenes</i> | UK      | Sandwiches: various fillings                | 2008             | 2 hospitals                       | Epi descriptive; Mibi: detection in food vehicle or its component; detection in food chain or its environment                  | 7           | 3               | no                 | > 60 years      | 67                   | 2                    | 29        | [32]             |
| <i>L. monocytogenes</i> | USA     | Tuna salad                                  | 2008             | Hospital                          | Epi descriptive; Mibi: detection in food vehicle or its component; detection in food chain or its environment                  | 5           | 3               | no                 | Adults, Elderly | 62 (52-92)           | 1                    | 20        | [33]             |
| <i>L. monocytogenes</i> | UK      | Sandwiches: various fillings                | 2010             | Hospital                          | Epi descriptive; Mibi: detection in food vehicle or its component; detection in food chain or its environment                  | 5           | 1               | no                 | NA              | NA                   | NA                   | NA        | [34]             |

| Agent causing outbreak  | Country   | Likely source or vehicle                            | Year of outbreak | Healthcare Setting                     | Evidence: link cases and food vehicle                                                                                          | No of cases                   | No of deaths         | Personnel in cases | Age groups      | Median (range) years              | No of female cases/N | % females       | Ref <sup>a</sup> |
|-------------------------|-----------|-----------------------------------------------------|------------------|----------------------------------------|--------------------------------------------------------------------------------------------------------------------------------|-------------------------------|----------------------|--------------------|-----------------|-----------------------------------|----------------------|-----------------|------------------|
| <i>L. monocytogenes</i> | USA       | Diced celery                                        | 2010             | 5 Acute care hospitals                 | Epi descriptive; Mibi: detection in food chain or its environment                                                              | 10                            | 5                    | no                 | Adults, Elderly | 80 (56-93)                        | 5                    | 50              | [35]             |
| <i>L. monocytogenes</i> | USA       | Milkshake                                           | 2010-2015        | Hospitals in 2 states                  | Epi descriptive; Mibi: detection in food vehicle or its component                                                              | 10                            | 3                    | no                 | NA              | NA                                | NA                   | NA              | [36]             |
| <i>L. monocytogenes</i> | UK        | Sandwiches: various fillings                        | 2011             | Hospital                               | Epi descriptive                                                                                                                | 3                             | 0                    | no                 | Adults, Elderly | 50~59                             | 1                    | 33              | [37]             |
| <i>L. monocytogenes</i> | Finland   | Ready-sliced meat jelly                             | 2012             | Municipal hospital, institutional care | Epi analytical: cohort study; Mibi: detection in food chain or its environment                                                 | 18 (10 hospital, 8 other HCF) | 3                    | no                 | Elderly         | 82 in hospital; 73 in other HCF   | 4/10 in hospital     | 40 in hospital  | [38]             |
| <i>L. monocytogenes</i> | Australia | Dessert                                             | 2013             | 3 Tertiary hospitals                   | Epi descriptive; Mibi: detection in food chain or its environment                                                              | 3                             | 1                    | no                 | Adults, Elderly | 79 (34-82)                        | NA                   | NA              | [39]             |
| <i>L. monocytogenes</i> | Germany   | Mixed salad <sup>s</sup>                            | 2013             | Hospital/medical care facility         | Mibi: detection in food vehicle or its component; detection in food chain or its environment                                   | 3                             | 1                    | no                 | Elderly         | NA                                | NA                   | NA              | SN22*            |
| <i>L. monocytogenes</i> | Denmark   | Spiced meat roll                                    | 2013-2014        | Hospitals, long-term care facilities   | Epi descriptive; Mibi: detection in food vehicle or its component; detection in food chain or its environment; Product-tracing | 20 <sup>t</sup> (5+15)        | 9 <sup>u</sup> (1+8) | no                 | Adults, Elderly | 71 (43-90) <sup>v</sup>           | 23/41 <sup>q</sup>   | 56 <sup>q</sup> | [40]             |
| <i>L. monocytogenes</i> | USA       | Ice cream mix, milkshake                            | 2014-2015        | Hospital                               | Epi descriptive; Mibi: detection in food vehicle or its component; detection in food chain or its environment                  | 3                             | 0                    | no                 | Adults          | 2 patients 50ies, 1 patient 40ies | 1                    | 33              | [41-43]          |
| <i>L. monocytogenes</i> | Germany   | Iceberg lettuce with yoghurt dressing, Gouda cheese | 2014             | Hospital/medical care facility         | Epi descriptive                                                                                                                | 2                             | 0                    | no                 | Elderly         | 83 (79-87)                        | 1                    | 50              | SN23*            |



| Agent causing outbreak          | Country | Likely source or vehicle                                                           | Year of outbreak | Healthcare Setting                           | Evidence: link cases and food vehicle                                              | No of cases | No of deaths | Personnel in cases | Age groups       | Median (range) years | No of female cases/N | % females                             | Ref <sup>a</sup> |
|---------------------------------|---------|------------------------------------------------------------------------------------|------------------|----------------------------------------------|------------------------------------------------------------------------------------|-------------|--------------|--------------------|------------------|----------------------|----------------------|---------------------------------------|------------------|
| <i>Bacillus cereus</i>          | France  | Pooled breast milk                                                                 | 2010             | Tertiary care teaching hospital              | Epi descriptive                                                                    | 2           | 0            | no                 | Newborn          | (29-30 weeks)        | NA                   | NA                                    | [44]             |
| <i>B. cereus</i>                | Austria | Fruit salad and deer ragout                                                        | 2013             | Rehabilitation clinic                        | Epi analytical: cohort study; Mibi: detection in food vehicle or its component     | 106         | 0            | no                 | Adults, Elderly? | 59                   | NA                   | Sex ratio (male :female ratio) 0.74:1 | [45]             |
| <i>B. cereus</i>                | Germany | Unknown                                                                            | 2017             | Nursing home                                 | No details/unknown/weak                                                            | 33          | 0            | no                 | Adults, Elderly  | 86 (63-97)           | 26                   | 79                                    | SN24             |
| <i>B. cereus</i>                | Germany | Canapes with turkey, canapes with ham, salmon canapes, vital wraps with vegetables | 2017             | Nursing home                                 | Epi descriptive; Mibi: detection in food vehicle or its component; Product-tracing | 26          | 0            | yes                | Adults, Elderly  | 70 (54-87)           | 3                    | 75                                    | SN25*            |
| <i>Clostridium perfringens</i>  | Japan   | Boiled beans                                                                       | 2001             | Nursing home                                 | Epi descriptive                                                                    | 90          | 0            | no                 | Elderly          | NA                   | NA                   | NA                                    | [46]             |
| <i>C. perfringens</i>           | USA     | Meal with turkey                                                                   | 2001             | Residential care facility for mentally ill   | Epi descriptive                                                                    | 7           | 0            | no                 | Adults           | 48 (30-59)           | 4                    | 57                                    | [47]             |
| <i>C. perfringens</i>           | USA     | Chicken                                                                            | 2010             | Psychiatric hospital                         | Epi descriptive; Mibi: detection in food vehicle or its component                  | 54          | 3            | yes                | Adults, Elderly? | NA                   | NA                   | NA                                    | [48]             |
| <i>C. perfringens</i>           | Germany | Unknown                                                                            | 2015             | Nursing home                                 | No details/unknown/weak                                                            | 10          | 0            | NA                 | Adults, Elderly  | 86 (46-100)          | 6                    | 60                                    | SN26             |
| <i>Escherichia coli</i> O157:H7 | Canada  | Salads and sandwiches                                                              | 2002             | Psychiatric hospital, health care facilities | Epi analytical: case-control study                                                 | 109         | 2            | yes                | Adults           | NA                   | NA                   | NA                                    | [49]             |
| <i>E. coli</i> O157:H7          | USA     | Raw spinach                                                                        | 2003             | Nursing home                                 | Epi analytical: case-control study                                                 | 46          | 1            | yes                | Elderly          | NA                   | NA                   | NA                                    | [50]             |

| Agent causing outbreak                                     | Country | Likely source or vehicle   | Year of outbreak | Healthcare Setting                       | Evidence: link cases and food vehicle                                                                                            | No of cases     | No of deaths | Personnel in cases | Age groups       | Median (range) years | No of female cases/N | % females       | Ref <sup>a</sup> |
|------------------------------------------------------------|---------|----------------------------|------------------|------------------------------------------|----------------------------------------------------------------------------------------------------------------------------------|-----------------|--------------|--------------------|------------------|----------------------|----------------------|-----------------|------------------|
| <i>E. coli</i> (ESBL)                                      | Japan   | Donor breast milk          | 2012             | Neonatal intensive care unit             | Epi analytical: case-control study; Mibi: detection in food vehicle or its component; detection in food chain or its environment | 4               | 0            | no                 | Newborn          | (26-37 weeks)        | 3                    | 50              | [51]             |
| <i>E. coli</i> O157                                        | Japan   | Pickled cabbage            | 2012             | Nursing homes                            | Epi descriptive; detection in food vehicle or its component                                                                      | 107             | 5            | no                 | Elderly          | 87 (72-102)          | 94                   | 88              | [52]             |
| <i>Campylobacter jejuni</i>                                | Austria | Poultry dishes             | 2006             | Tertiary care hospital                   | Epi descriptive                                                                                                                  | 21              | 0            | yes                | Adults, Elderly? | NA                   | NA                   | NA              | [53]             |
| <i>C. jejuni</i>                                           | Germany | Unknown                    | 2015             | Rehabilitation centre                    | No details/unknown/weak                                                                                                          | 15              | 0            | NA                 | Adults, Elderly  | 62 (47-87)           | 10                   | 67              | SN27             |
| <i>C. jejuni</i>                                           | Germany | Unknown                    | 2017             | Rehabilitation centre                    | No details/unknown/weak                                                                                                          | 18              | 0            | NA                 | Adults, Elderly  | 52 (23-65)           | 12                   | 67              | SN28             |
| Group A $\beta$ -hemolytic streptococci (GAS)              | Turkey  | Milky dessert              | 2008             | Hospital                                 | Epi analytical: case-control study; Mibi: detection in food vehicle or its component                                             | 251             | 0            | yes                | Adults           | NA                   | NA                   | NA              | [54]             |
| <i>Klebsiella pneumoniae</i>                               | Spain   | Handmade fruit puree, soup | 2008             | Acute care Hospital                      | Epi analytical: case-control study                                                                                               | 35              | 0            | no <sup>w</sup>    | Elderly          | mean 69 <sup>x</sup> | NA                   | 43 <sup>x</sup> | [55]             |
| <i>Citrobacter freundii</i> (VIM Carbapenemase-Expressing) | Germany | Presliced vegetables       | 2016             | University hospital                      | Epi descriptive; Mibi: detection in food vehicle or its component; detection in food chain or its environment                    | 76 <sup>y</sup> | 0            | no                 | Adults, Elderly  | mean 69 (54-84)      | 43                   | 45              | [56]             |
| <i>Cyclospora cayentanensis</i>                            | USA     | Snow peas                  | 2004             | Residential facility                     | Epi analytical: cohort study; Product-tracing                                                                                    | 96              | 0            | NA                 | Adults           | NA                   | NA                   | NA              | [57, 58]         |
| <i>Blastoschizomyces capitatus</i>                         | Spain   | Milk                       | 2002             | Tertiary care hospital: haematology unit | Epi descriptive; Mibi: detection in food chain or its environment                                                                | 4               | 2            | no                 | Adults, Elderly  | NA                   | NA                   | NA              | [59]             |

- 
- <sup>a</sup> SN: SurvNet; Outbreak retrieved from the German electronic surveillance system (SurvNet@RKI) (search date: 11 September 2019)  
SN\*: Outbreaks categorised as "strong-evidence"-FBOs according to EFSA criteria [60]
- <sup>b</sup> Mibi: microbiological evidence
- <sup>c</sup> NA: not available
- <sup>d</sup> Only for the 37 patients in HCFs (i.e. age and gender of 10 members of personnel not included)
- <sup>e</sup> Based on 133 outbreak cases (i.e. including 31 visitors)
- <sup>f</sup> Not clear if infant healthcare-associated
- <sup>g</sup> Based on 41 outbreak cases (of which 29 cases were healthcare-associated)
- <sup>h</sup> Case number reported to EFSA
- <sup>i</sup> Infected food handler
- <sup>j</sup> Based on 150 outbreak cases due to late reporting
- <sup>k</sup> Norovirus: suspected aetiological agent, Kaplan criteria met
- <sup>l</sup> Based on a total of 35 outbreak cases (i.e. 21 residents, eight staff members and six guests)
- <sup>m</sup> Based on 204 outbreak cases (i.e. 114 patients and resident cases, 34 staff and 56 secondary cases)
- <sup>n</sup> Risk factor: unprocessed contaminated ingredient, inadequate heat treatment
- <sup>o</sup> Risk factor: unprocessed contaminated ingredient
- <sup>p</sup> Information available for 18 outbreak cases
- <sup>q</sup> Information available for 6 outbreak cases
- <sup>r</sup> In total there were 57 outbreak cases (48 healthcare-associated, nine from community);  
of 24 fatalities, not clear if all deaths were healthcare-associated
- <sup>s</sup> Risk factor: Unprocessed contaminated ingredient
- <sup>t</sup> For 15/20 case patients, the place of exposure was possibly in hospitals/long-term care
- <sup>u</sup> For 8/9 deaths the place of exposure was possibly in hospitals/long-term care
- <sup>v</sup> Based on 41 outbreaks cases (of which 29 considered healthcare-associated)
- <sup>w</sup> 1 food handler and 5 cleaning staff were faecal carriers (not included in outbreak case number)
- <sup>x</sup> Based on 156 colonized and/or infected patients
- <sup>y</sup> Colonisations (i.e. not infections)

## References

1. Hamada K & Tsuji H. Salmonella Brandenburg and S. Corvallis involved in a food poisoning outbreak in a hospital in Hyogo Prefecture. *Jpn J Infect Dis* 2001; 54(5):195-6. PMID: 11754160
2. Bruins MJ, Fernandes TM, Ruijs GJ, Wolfhagen MJ, van Rijn-van Berkel JM, Schenk BE, et al. Detection of a nosocomial outbreak of salmonellosis may be delayed by application of a protocol for rejection of stool cultures. *J Hosp Infect* 2003; 54(2):93-8. PMID: 12818580
3. Tribe IG, Cowell D, Cameron P & Cameron S. An outbreak of Salmonella typhimurium phage type 135 infection linked to the consumption of raw shell eggs in an aged care facility. *Commun Dis Intell Q Rep* 2002; 26(1):38-9. PMID: 11950200
4. Public Health Laboratory Services. Salmonella Enteritidis outbreak in a London hospital - update. *CDR Wkly* 2003; 13(8).
5. Miller T, Brockmann S, Spackova M, Wetzig J, Frank C, Pfeifer Y, et al. Recurrent outbreaks caused by the same Salmonella enterica serovar Infantis clone in a German rehabilitation oncology clinic from 2002 to 2009. *J Hosp Infect* 2018; 100(4):e233-e238. <https://doi.org/10.1016/j.jhin.2018.03.035> PMID: 29614246
6. Elward A, Grim A, Schroeder P, Kieffer P, Sellenriek P, Ferrett R, et al. Outbreak of Salmonella javiana infection at a children's hospital. *Infect Control Hosp Epidemiol* 2006; 27(6):586-92. <https://doi.org/10.1086/504935> PMID: 16755478
7. Heissenhuber A, Hautmann W, Arenz S, Kugler R, Kleih W, Ludwig S, et al. [Accumulated occurrence of illnesses with Salmonella enteritidis in hospitals and nursing homes in the district Oberallgaeu, Bavaria, in July 2004]. *Gesundheitswesen* 2005; 67(12):845-52. <https://doi.org/10.1055/s-2005-858898> PMID: 16379046
8. Gikas A, Kritsotakis EI, Maraki S, Roubelaki M, Babalis D, Scoulica E, et al. A nosocomial, foodborne outbreak of Salmonella Enterica serovar Enteritidis in a university hospital in Greece: the importance of establishing HACCP systems in hospital catering. *J Hosp Infect* 2007; 66(2):194-6. <https://doi.org/10.1016/j.jhin.2007.03.001> PMID: 17482719
9. Frank C, Buchholz U, Maass M, Schroder A, Bracht KH, Domke PG, et al. Protracted outbreak of S. Enteritidis PT 21c in a large Hamburg nursing home. *BMC Public Health* 2007; 7:243. <https://doi.org/10.1186/1471-2458-7-243> PMID: 17854497
10. Centers for Disease Control and Prevention. Salmonella Oranienburg infections associated with fruit salad served in health-care facilities--northeastern United States and Canada, 2006. *MMWR Morb Mortal Wkly Rep* 2007; 56(39):1025-8. PMID: 17914330
11. Jansen A, Hiller P, Desai S, Feier B, Habermann F, Baumann A, et al. [Protracted nosocomial outbreak of Salmonella Enteritidis LT 8/7]. *Z Gastroenterol* 2008; 46(11):1270-4. <https://doi.org/10.1055/s-2008-1027543> PMID: 19012198
12. Poetter C, Kunstmann G, Peter D & Mattner F. Containment of a cheesecake-associated outbreak of salmonellosis in 3 different hospitals, detected by continuous microbiologic surveillance. *Am J Infect Control* 2014; 42(7):816-7. <https://doi.org/10.1016/j.ajic.2014.03.013> PMID: 24825536
13. Bayer C, Bernard H, Prager R, Rabsch W, Hiller P, Malorny B, et al. An outbreak of *Salmonella* Newport associated with mung bean sprouts in Germany and the Netherlands, October to November 2011. *Euro Surveill* 2014; 19(1). PMID: 24434173
14. Styles T, Phan Q, Rabatsky-Ehr T, Applewhite C, Sosa L & Cartter M. Salmonella enterica serotype enteritidis outbreak at a long-term care facility, Connecticut, 2012. *Conn Med* 2013; 77(10):587-90. PMID: 24367841
15. Inns T, Lane C, Peters T, Dallman T, Chatt C, McFarland N, et al. A multi-country Salmonella Enteritidis phage type 14b outbreak associated with eggs from a German producer: 'near real-time' application of whole genome sequencing and food chain investigations, United Kingdom, May to September 2014. *Euro Surveill* 2015; 20(16). PMID: 25953273
16. Schielke A, Rabsch W, Prager R, Simon S, Fruth A, Helling R, et al. Two consecutive large outbreaks of Salmonella Muenchen linked to pig farming in Germany, 2013 to 2014: Is something missing in our regulatory framework? *Euro Surveill* 2017; 22(18). <https://doi.org/10.2807/1560-7917.ES.2017.22.18.30528> PMID: 28494842
17. Almagro Nievas D, Conti Cuesta F, Espinola Garcia E, Morcillo Rodenas C, Nunez Sevilla C, Linares Torres J, et al. [Outbreak of gastroenteritis caused by Norwalk virus at a senior citizens assisted living facility in Granada, Spain]. *Rev Esp Salud Publica* 2003; 77(2):283-91. PMID: 12728663
18. Eriksen HM, Guerin PJ, Nygard K, Hjertqvist M, de Jong B, Rose AM, et al. Gastro-enteritis outbreak among Nordic patients with psoriasis in a health centre in Gran Canaria, Spain: a cohort study. *BMC Infect Dis* 2004; 4:45. <https://doi.org/10.1186/1471-2334-4-45> PMID: 15511300
19. Falkenhorst G, Krusell L, Lisby M, Madsen SB, Bottiger B & Molbak K. Imported frozen raspberries cause a series of norovirus outbreaks in Denmark, 2005. *Euro Surveill* 2005; 10(9):E050922. PMID: 16788235

20. Medici MC, Morelli A, Arcangeletti MC, Calderaro A, De Conto F, Martinelli M, et al. An outbreak of norovirus infection in an Italian residential-care facility for the elderly. *Clin Microbiol Infect* 2009; 15(1):97-100. <https://doi.org/10.1111/j.1469-0691.2008.02117.x> PMID: 19220341
21. Ohwaki K, Nagashima H, Aoki M, Aoki H & Yano E. A foodborne norovirus outbreak at a hospital and an attached long-term care facility. *Jpn J Infect Dis* 2009; 62(6):450-4. PMID: 19934537
22. Schmid D, Kuo HW, Hell M, Kasper S, Lederer I, Mikula C, et al. Foodborne gastroenteritis outbreak in an Austrian healthcare facility caused by asymptomatic, norovirus-excreting kitchen staff. *J Hosp Infect* 2011; 77(3):237-41. <https://doi.org/10.1016/j.jhin.2010.11.015> PMID: 21272956
23. Hoffmann D, Mauroy A, Seebach J, Simon V, Wantia N & Protzer U. New norovirus classified as a recombinant GII.g/GII.1 causes an extended foodborne outbreak at a university hospital in Munich. *J Clin Virol* 2013; 58(1):24-30. <https://doi.org/10.1016/j.jcv.2013.06.018> PMID: 23849648
24. Bernard H, Faber M, Wilking H, Haller S, Hohle M, Schielke A, et al. Large multistate outbreak of norovirus gastroenteritis associated with frozen strawberries, Germany, 2012. *Euro Surveill* 2014; 19(8):20719. PMID: 24602278
25. Loury P, Le Guyader FS, Le Saux JC, Ambert-Balay K, Parrot P & Hubert B. A norovirus oyster-related outbreak in a nursing home in France, January 2012. *Epidemiol Infect* 2015; 143(12):2486-93. <https://doi.org/10.1017/s0950268814003628> PMID: 25567093
26. Shetty A, McLaughlin J, Grant K, O'Brien D, Howard T & Davies EM. Outbreak of *Listeria monocytogenes* in an oncology unit associated with sandwiches consumed in hospital. *J Hosp Infect* 2009; 72(4):332-6. <https://doi.org/10.1016/j.jhin.2009.01.012> PMID: 19278752
27. Dawson SJ, Evans MR, Willby D, Bardwell J, Chamberlain N & Lewis DA. *Listeria* outbreak associated with sandwich consumption from a hospital retail shop, United Kingdom. *Euro Surveill* 2006; 11(6):89-91. PMID: 16801694
28. Health Protection Agency. Human listeriosis linked to hospital sandwiches: implications for procurement and storage. *Health Protection Report* 2(35). 29 August 2008 news. 2008. <https://webarchive.nationalarchives.gov.uk/20140714101922/http://www.hpa.org.uk/hpr/archives/2008/news3508.htm> (accessed 29.03.2020).
29. Winter CH, Brockmann SO, Sonntag SR, Schaupp T, Prager R, Hof H, et al. Prolonged hospital and community-based listeriosis outbreak caused by ready-to-eat scalded sausages. *J Hosp Infect* 2009; 73(2):121-8. <https://doi.org/10.1016/j.jhin.2009.06.011> PMID: 19716628
30. Johnsen BO, Lingaas E, Torfoss D, Strom EH & Nordoy I. A large outbreak of *Listeria monocytogenes* infection with short incubation period in a tertiary care hospital. *J Infect* 2010; 61(6):465-70. <https://doi.org/10.1016/j.jinf.2010.08.007> PMID: 20813130
31. Currie A, Farber JM, Nadon C, Sharma D, Whitfield Y, Gaulin C, et al. Multi-province listeriosis outbreak linked to contaminated deli meat consumed primarily in institutional settings, Canada, 2008. *Foodborne Pathog Dis* 2015; 12(8):645-52. <https://doi.org/10.1089/fpd.2015.1939> PMID: 26258258
32. Public Health Agency Northern Ireland. The report of the Outbreak Control Team of the investigation of an outbreak of listeriosis in the Belfast Health and Social Care Trust during May to November 2008. 2009. <https://www.publichealth.hscni.net/sites/default/files/ListeriaReport.pdf> (accessed 29.03.2020).
33. Cokes C, France AM, Reddy V, Hanson H, Lee L, Kornstein L, et al. Serving high-risk foods in a high-risk setting: survey of hospital food service practices after an outbreak of listeriosis in a hospital. *Infect Control Hosp Epidemiol* 2011; 32(4):380-6. <https://doi.org/10.1086/658943> PMID: 21460490
34. Little CL, Gormley F, Mook P, Gillespie I, Foster K, Harris J, et al. Advisory Committee on the Microbiological Safety of Food Information Paper. Outbreaks of infection associated with ready-to-eat foods. ACM/1014. London: Food Standards Agency. 2011. [https://acmsf.food.gov.uk/sites/default/files/mnt/drupal\\_data/sources/files/multimedia/pdfs/committee/acm1014hpa.pdf](https://acmsf.food.gov.uk/sites/default/files/mnt/drupal_data/sources/files/multimedia/pdfs/committee/acm1014hpa.pdf).
35. Gaul LK, Farag NH, Shim T, Kingsley MA, Silk BJ & Hyytia-Trees E. Hospital-acquired listeriosis outbreak caused by contaminated diced celery--Texas, 2010. *Clin Infect Dis* 2013; 56(1):20-6. <https://doi.org/10.1093/cid/cis817> PMID: 22997210
36. Centers for Disease Control and Prevention. (2015). Multistate outbreak of listeriosis linked to Blue Bell creameries products (Final Update). <https://www.cdc.gov/listeria/outbreaks/ice-cream-03-15/index.html>
37. Coetzee N, Laza-Stanca V, Orendi JM, Harvey S, Elviss NC & Grant KA. A cluster of *Listeria monocytogenes* infections in hospitalised adults, Midlands, England, February 2011. *Euro Surveill* 2011; 16(20):19869. PMID: 21616050
38. Jacks A, Pihlajasaari A, Vahe M, Myntti A, Kaukoranta SS, Elomaa N, et al. Outbreak of hospital-acquired gastroenteritis and invasive infection caused by *Listeria monocytogenes*, Finland, 2012. *Epidemiol Infect* 2016; 144(13):2732-42. <https://doi.org/10.1017/s0950268815002563> PMID: 26493730
39. Najjar Z, Gupta L, Sintchenko V, Shadbolt C, Wang Q & Bansal N. Listeriosis cluster in Sydney linked to hospital food. *Med J Aust* 2015; 202(8):448-9. PMID: 25929511
40. Kvistholm Jensen A, Nielsen EM, Bjorkman JT, Jensen T, Muller L, Persson S, et al. Whole-genome sequencing used to investigate a nationwide outbreak of listeriosis caused by ready-to-eat delicatessen meat, Denmark, 2014. *Clin Infect Dis* 2016; 63(1):64-70. <https://doi.org/10.1093/cid/ciw192> PMID: 27025820

41. Rietberg K, Lloyd J, Melius B, Wyman P, Treadwell R, Olson G, et al. Outbreak of *Listeria monocytogenes* infections linked to a pasteurized ice cream product served to hospitalized patients. *Epidemiol Infect* 2016; 144(13):2728-31. <https://doi.org/10.1017/s0950268815003039> PMID: 27586030
42. Mazengia E, Kawakami V, Rietberg K, Kay M, Wyman P, Skilton C, et al. Hospital-acquired listeriosis linked to a persistently contaminated milkshake machine. *Epidemiol Infect* 2017; 145(5):857-863. <https://doi.org/10.1017/S0950268816003198> PMID: 28065212
43. Li Z, Perez-Osorio A, Wang Y, Eckmann K, Glover WA, Allard MW, et al. Whole genome sequencing analyses of *Listeria monocytogenes* that persisted in a milkshake machine for a year and caused illnesses in Washington State. *BMC Microbiol* 2017; 17(1):134. <https://doi.org/10.1186/s12866-017-1043-1> PMID: 28619007
44. Decousser JW, Ramarao N, Duport C, Dorval M, Bourgeois-Nicolaos N, Guinebretiere MH, et al. *Bacillus cereus* and severe intestinal infections in preterm neonates: Putative role of pooled breast milk. *Am J Infect Control* 2013; 41(10):918-21. <https://doi.org/10.1016/j.ajic.2013.01.043> PMID: 23769834
45. Schmid D, Rademacher C, Kanitz EE, Frenzel E, Simons E, Allerberger F, et al. Elucidation of enterotoxigenic *Bacillus cereus* outbreaks in Austria by complementary epidemiological and microbiological investigations, 2013. *Int J Food Microbiol* 2016; 232:80-6. <https://doi.org/10.1016/j.ijfoodmicro.2016.05.011> PMID: 27257745
46. Tanaka D, Isobe J, Hosorogi S, Kimata K, Shimizu M, Katori K, et al. An outbreak of food-borne gastroenteritis caused by *Clostridium perfringens* carrying the cpe gene on a plasmid. *Jpn J Infect Dis* 2003; 56(3):137-9. PMID: 12944687
47. Bos J, Smithee L, McClane B, Distefano RF, Uzal F, Songer JG, et al. Fatal necrotizing colitis following a foodborne outbreak of enterotoxigenic *Clostridium perfringens* type A infection. *Clin Infect Dis* 2005; 40(10):e78-83. <https://doi.org/10.1086/429829> PMID: 15844055
48. Centers for Disease Control and Prevention. Fatal foodborne *Clostridium perfringens* illness at a state psychiatric hospital--Louisiana, 2010. *MMWR Morb Mortal Wkly Rep* 2012; 61(32):605-8. PMID: 22895383
49. Bolduc D, Srour LF, Sweet L, Neatby A, Galanis E, Isaacs S, et al. Severe outbreak of *Escherichia coli* O157:H7 in health care institutions in Charlottetown, Prince Edward Island, fall, 2002. *Can Commun Dis Rep* 2004; 30(9):81-8. PMID: 15132397
50. Reiss G, Kunz P, Koin D & Keeffe EB. *Escherichia coli* O157:H7 infection in nursing homes: review of literature and report of recent outbreak. *J Am Geriatr Soc* 2006; 54(4):680-4. <https://doi.org/10.1111/j.1532-5415.2006.00682.x> PMID: 16686882
51. Nakamura K, Kaneko M, Abe Y, Yamamoto N, Mori H, Yoshida A, et al. Outbreak of extended-spectrum beta-lactamase-producing *Escherichia coli* transmitted through breast milk sharing in a neonatal intensive care unit. *J Hosp Infect* 2016; 92(1):42-6. <https://doi.org/10.1016/j.jhin.2015.05.002> PMID: 26238662
52. Tabuchi A, Wakui T, Yahata Y, Yano K, Azuma K, Yamagishi T, et al. A large outbreak of enterohaemorrhagic *Escherichia coli* O157, caused by low-salt pickled Napa cabbage in nursing homes, Japan, 2012. *Western Pac Surveill Response J* 2015; 6(2):7-11. <https://doi.org/10.5365/wpsar.2014.5.1.012> PMID: 26306209
53. Jelovcan S, Schmid D, Lederer I, Hell M, Rehberger K, Arnhold D, et al. Cluster of nosocomial campylobacteriosis, Austria 2006. *J Hosp Infect* 2008; 69(1):97-8. <https://doi.org/10.1016/j.jhin.2008.01.010> PMID: 18329135
54. Ertugrul BM, Erol N, Emek M, Ozturk B, Saylak OM, Cetin K, et al. Food-borne tonsillopharyngitis outbreak in a hospital cafeteria. *Infection* 2012; 40(1):49-55. <https://doi.org/10.1007/s15010-011-0166-9> PMID: 21826437
55. Calbo E, Freixas N, Xercavins M, Riera M, Nicolas C, Monistrol O, et al. Foodborne nosocomial outbreak of SHV1 and CTX-M-15-producing *Klebsiella pneumoniae*: epidemiology and control. *Clin Infect Dis* 2011; 52(6):743-9. <https://doi.org/10.1093/cid/ciq238> PMID: 21367727
56. Pletz MW, Wollny A, Dobermann UH, Rodel J, Neubauer S, Stein C, et al. A nosocomial foodborne outbreak of a VIM Carbapenemase-expressing *Citrobacter freundii*. *Clin Infect Dis* 2018; 67(1):58-64. <https://doi.org/10.1093/cid/ciy034> PMID: 29346622
57. Centers for Disease Control and Prevention. Outbreak of cyclosporiasis associated with snow peas--Pennsylvania, 2004. *MMWR Morb Mortal Wkly Rep* 2004; 53(37):876-8. PMID: 15385921
58. Heilpern KL & Wald M. Update on emerging infections: news from the Centers for Disease Control and Prevention. Outbreak of cyclosporiasis associated with snow peas--Pennsylvania, 2004. *Ann Emerg Med* 2005; 45(5):529-31. <https://doi.org/10.1016/j.annemergmed.2005.02.006> PMID: 15855952
59. Gurgui M, Sanchez F, March F, Lopez-Contreras J, Martino R, Cotura A, et al. Nosocomial outbreak of *Blastoschizomyces capitatus* associated with contaminated milk in a haematological unit. *J Hosp Infect* 2011; 78(4):274-8. <https://doi.org/10.1016/j.jhin.2011.01.027> PMID: 21658800
60. EFSA (European Food Safety Authority). Update of the technical specifications for harmonised reporting of food-borne outbreaks through the European Union reporting system in accordance with Directive 2003/99/EC. *EFSA Journal* 2014; 12((3):3598). <https://doi.org/10.2903/j.efsa.2014.3598>
